# Supplementary material for: The role of the oxime group in the excited state deactivation processes of indirubin
Source: Royal Society of Chemistry journal article supplement (doi:10.1039/d3cp05260e), 2024-01-01
Supplement: d3cp05260e1.pdf [file d3cp05260e1.pdf]

**Supplementary Information to**

**The role of the oxime group in the excited state  
deactivation processes of indirubin**

Daniela C. Nobre<sup>a</sup>, Estefanía Delgado-Pinar<sup>a,b</sup>, Carla Cunha<sup>a</sup>, J. Sérgio Seixas  
de Melo<sup>a\*</sup>

<sup>a</sup>University of Coimbra, CQC-ISM, Department of Chemistry, P3004-535 Coimbra,  
Portugal

<sup>b</sup>Instituto de Ciencia Molecular, Departamento de Química Inorgánica, Universidad de  
Valencia, C/Catedrático José Beltrán 2, 46980, Paterna, Valencia, Spain

\* email: [sseixas@ci.uc.pt](mailto:sseixas@ci.uc.pt)

## **Table of Contents**

|                                                                         |           |
|-------------------------------------------------------------------------|-----------|
| <b>Synthesis of the indirubin derivatives.....</b>                      | <b>3</b>  |
| <b>Synthesis of the oxime-indirubin derivatives .....</b>               | <b>4</b>  |
| <b>Time-Dependent Density Functional Theoretical Calculations .....</b> | <b>12</b> |
| <b>References .....</b>                                                 | <b>16</b> |

## Synthesis of the indirubin derivatives

The synthesis of the indirubin derivatives (see **Scheme SI1**) was achieved by following the general procedure described by Russell and Kaupp<sup>1,2</sup>. Although the synthetic protocol is well-known, some modifications in the work-up and in the purification, step should be added in order to avoid the formation of non-desirable indigo compound<sup>3</sup>. Very briefly, anhydrous methanol was degassed by bubbling nitrogen directly into the solution for 20 min. Then, 3-indoxyl acetate (200 mg, 1.14 mmol), potassium carbonate (1.9 mmol) and the corresponding isatin derivative (1.14 mmol) were added, under stirring, to the round bottom flask keeping the nitrogen bubbling for another 45 min. In all cases, a precipitate is formed, collected by filtration and washed with the appropriate solvent. The purification by column chromatography was performed depending on the derivative.

**N-methylindirubin (MINR) and indirubin (INR)** were prepared following ref.<sup>3</sup> and <sup>1</sup>H, <sup>13</sup>C and excitation spectra were used to characterize them and check their purity grade.

**6-Bromoindirubin (6-BrINR), (2'Z)-6-Bromoindirubin.** 6-bromoisatin was used (258 mg) for the synthesis of (**6-BrINR**). The precipitated obtained was washed with methanol and cold dichloromethane. The filtrate was dried under vacuum and a reddish solid was obtained (323 mg, 83%).

<sup>1</sup>H NMR (400 MHz, DMSO-d<sub>6</sub>) δ (ppm): 8.63 (d, J = 8.3 Hz, 1H, H4), 7.63 (d, J = 7.3 Hz, 1H, H4'), 7.57 (t, J = 7.1 Hz, H6'), 7.39 (d, J = 8.1 Hz, H7'), 7.13 (dd, J = 8.3, 2.0 Hz, H5), 7.03-7.00 (m, H5'-H7). <sup>13</sup>C NMR (101 MHz, DMSO-d<sub>6</sub>) δ (ppm): 188.6 (C3'), 171.7 (C2), 152.3 (C2'), 144.3 (C7'a), 138.23 (C7a), 136.9 (C6'), 125.6 (C4), 124.2 (C4'), 122.9 (C5), 121.3 (C3a), 121.1 (C5'), 120.9 (C3'a), 118.8 (C6), 113.3 (C7), 112.4 (C7'), 106.1 (C3). ESI-MS (m/z): Calculated for C<sub>16</sub>H<sub>9</sub>BrN<sub>2</sub>O<sub>2</sub>: 341.16; Found [L + H]<sup>+</sup>: 342.98

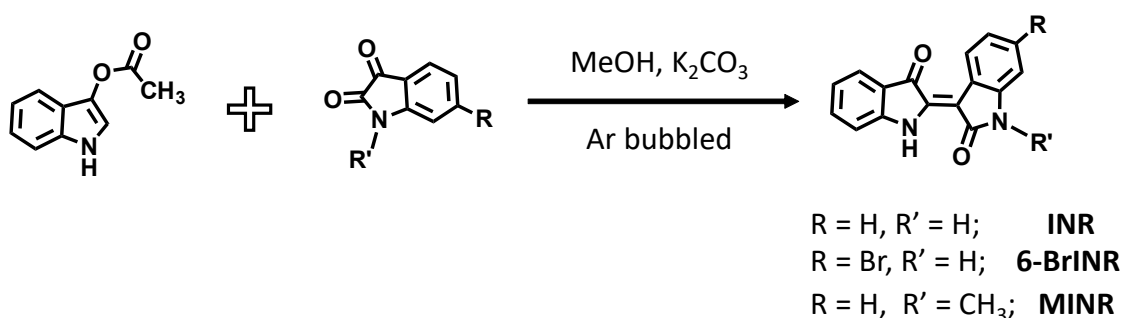

**Scheme SI1.** Synthetic pathway for the synthesis of **INR**, **6-BrINR** and **MINR**.

## Synthesis of the oxime-indirubin derivatives

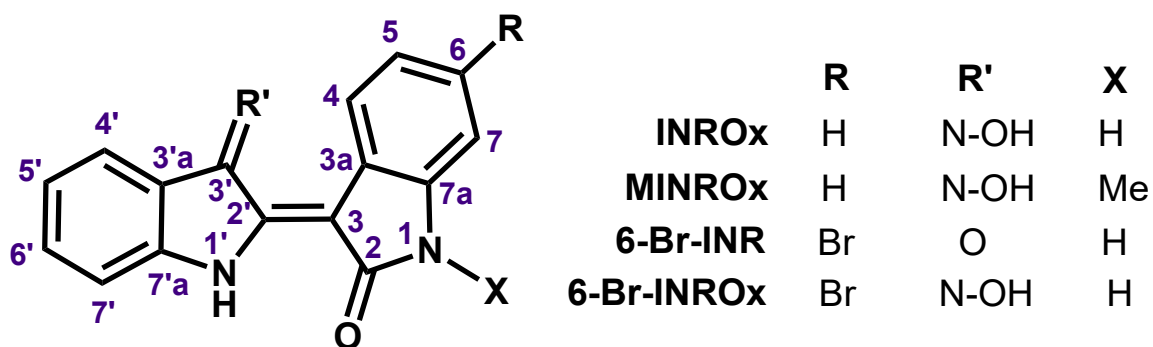

Scheme S12. Chemical structures of the indirubin derivatives studied in this work.

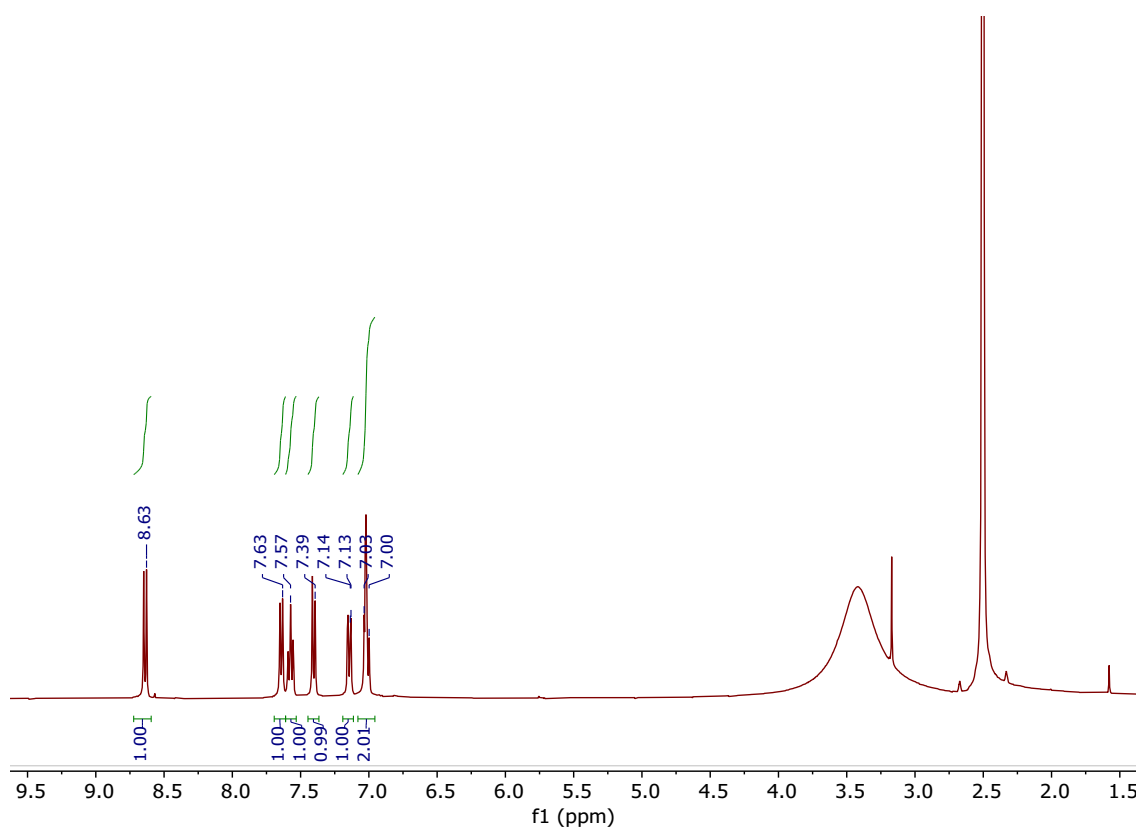

Fig. S11 <sup>1</sup>H NMR spectrum of 6-BrINR in DMSO-d<sub>6</sub>.

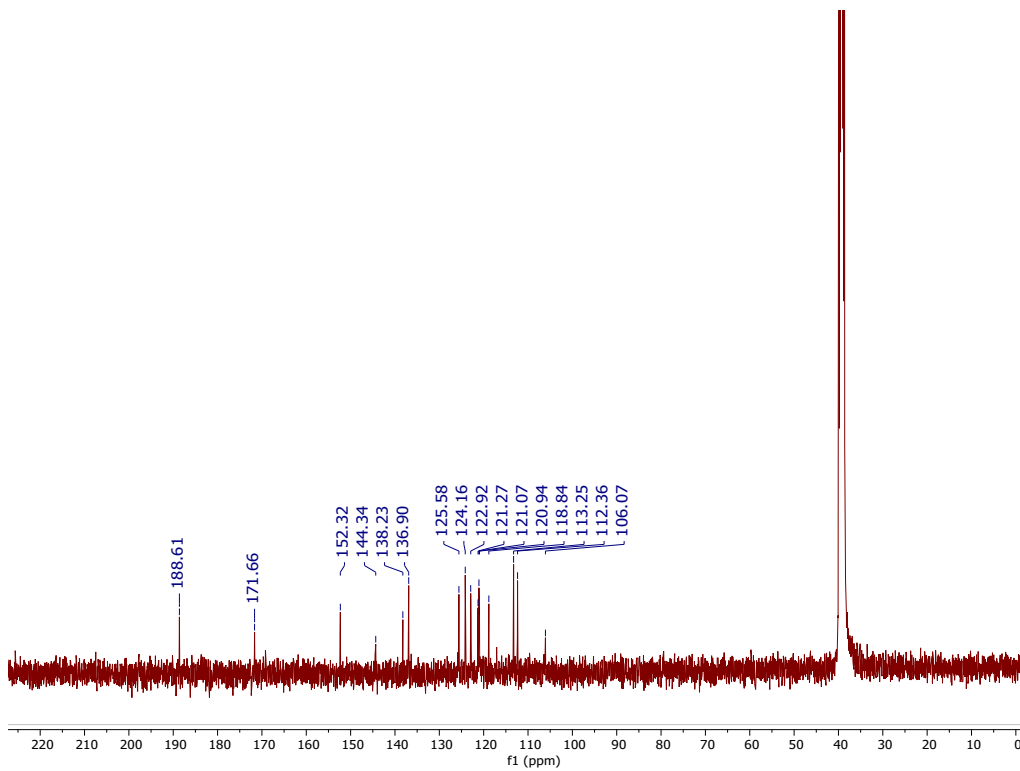

Fig. S12  $^{13}\text{C}$  NMR spectrum of 6-BrINR in  $\text{DMSO-d}_6$ .

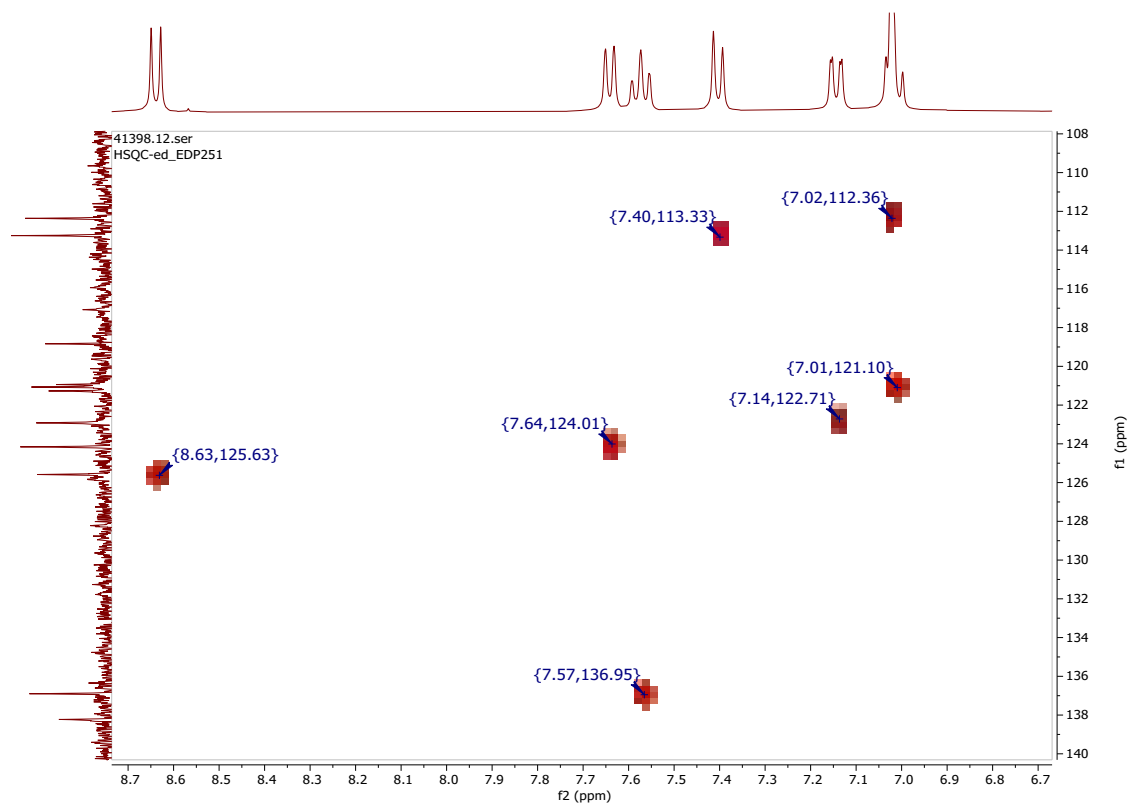

Fig. S13 HSQC NMR spectrum of 6-BrINR in  $\text{DMSO-d}_6$ .

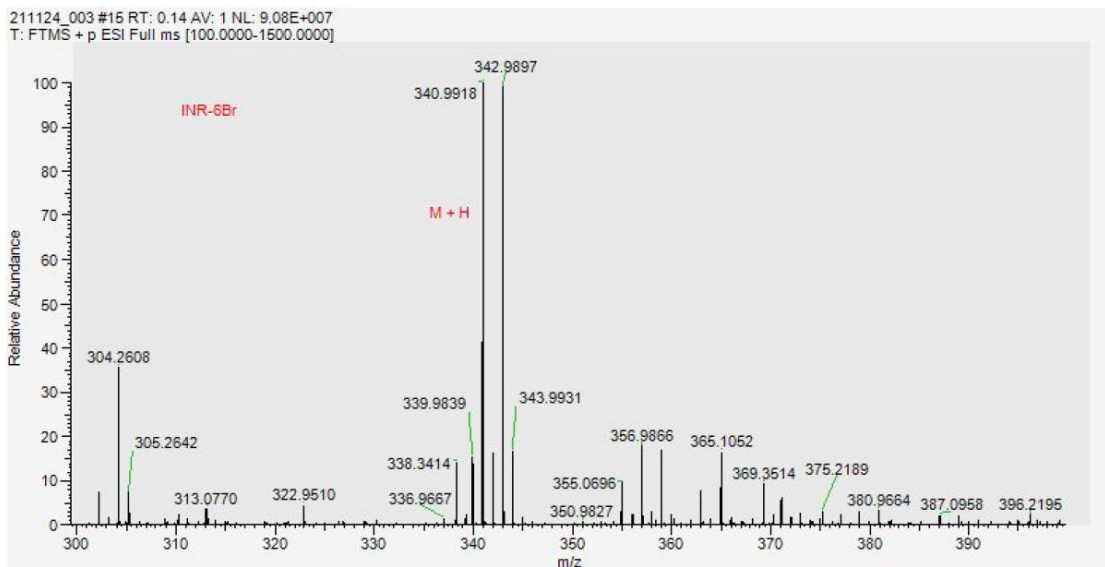

**Fig. S14** Mass spectrum of 6-BrINR.

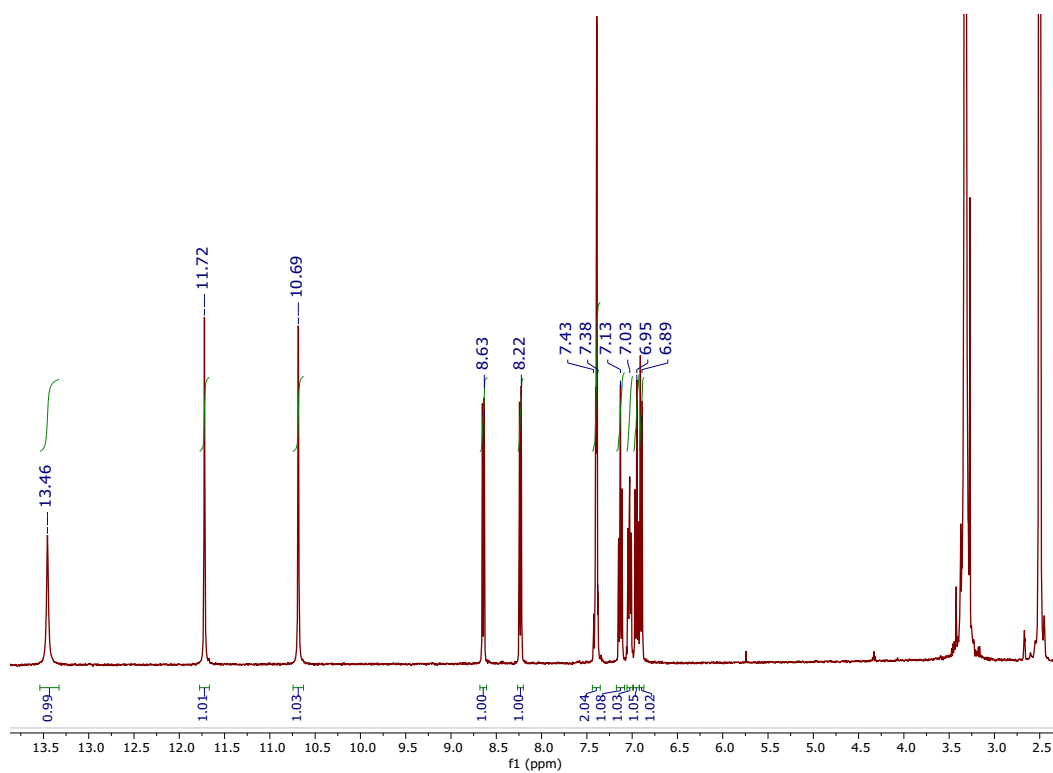

**Fig. S15** <sup>1</sup>H NMR spectrum of INROx in DMSO-d<sub>6</sub>.

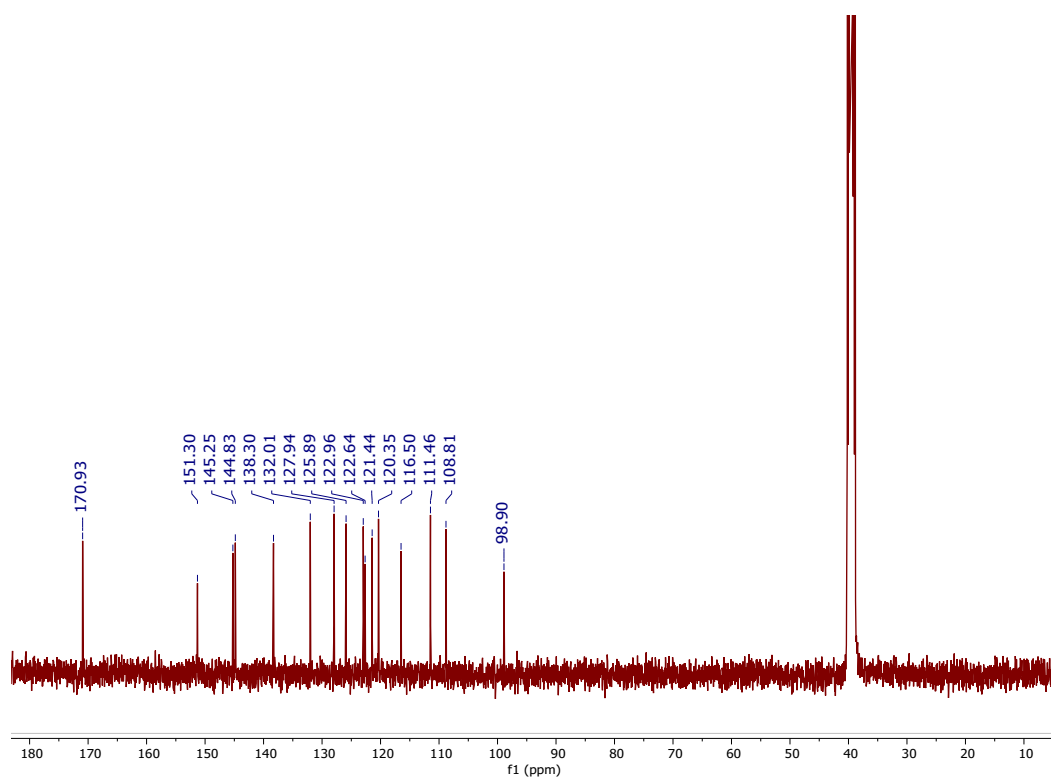

Fig. S16  $^{13}\text{C}$  NMR spectrum of INROx in  $\text{DMSO-d}_6$ .

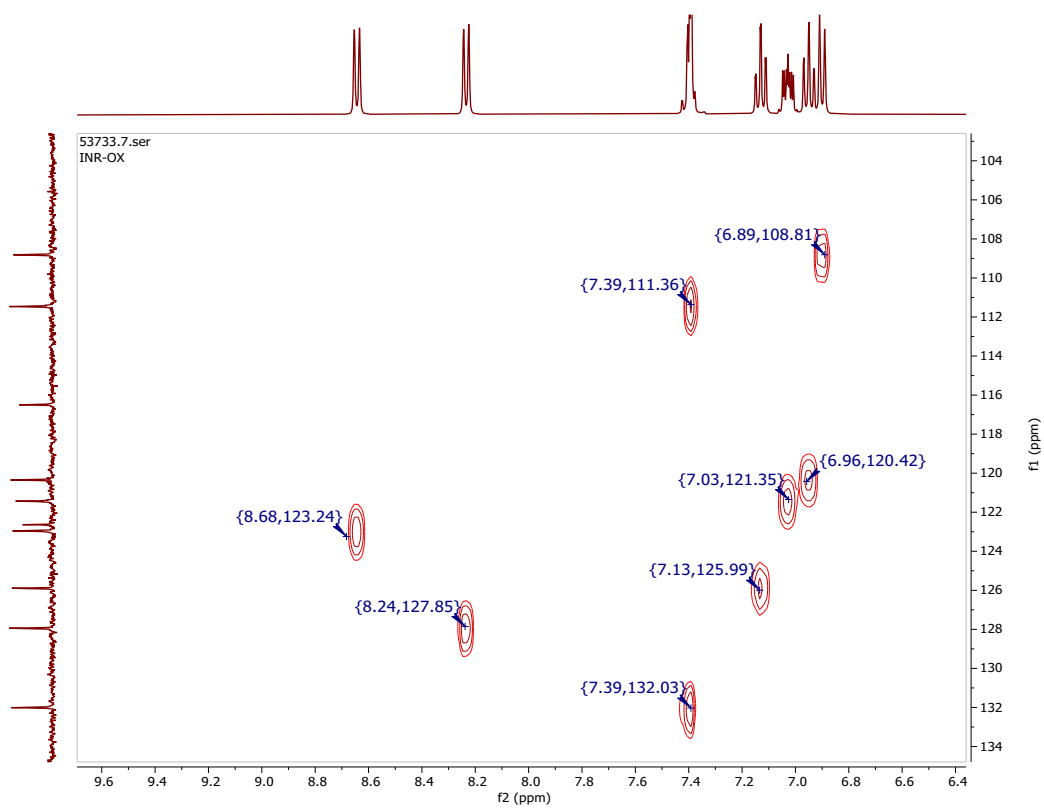

Fig. S17 HSQC NMR spectrum of INROx in  $\text{DMSO-d}_6$ .

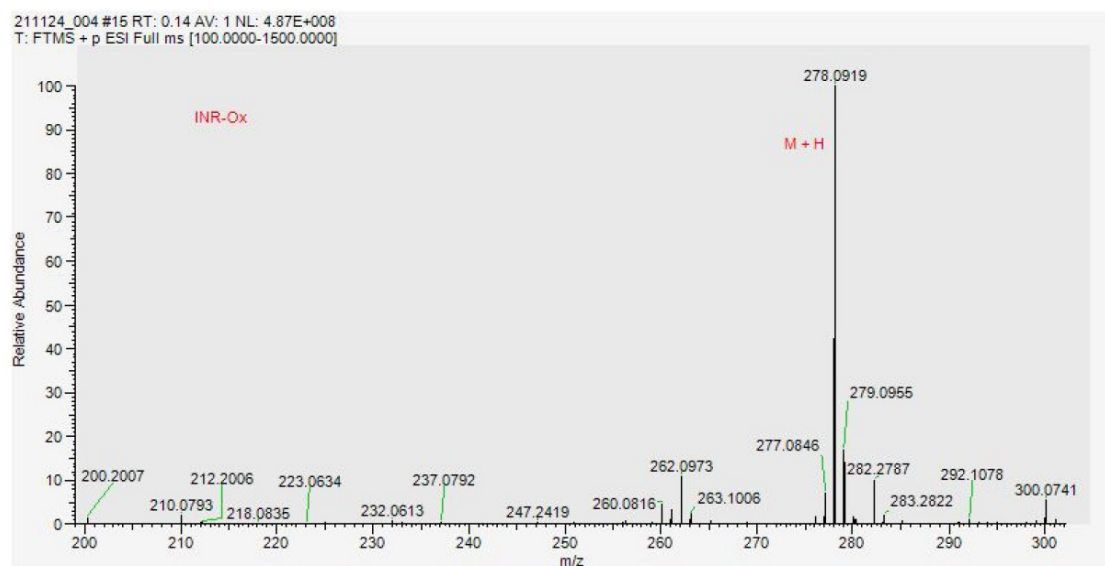

Fig. S18 Mass spectrum of INROx.

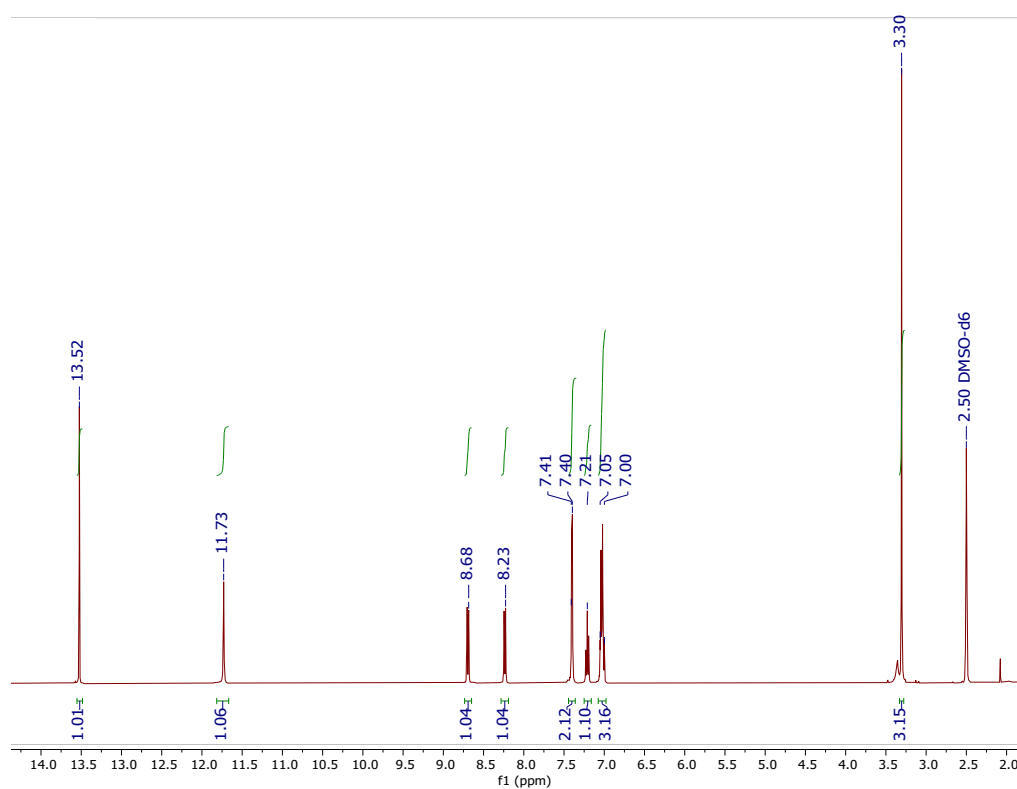

Fig. S19  $^1\text{H}$  NMR spectrum of MINROx in  $\text{DMSO-d}_6$ .



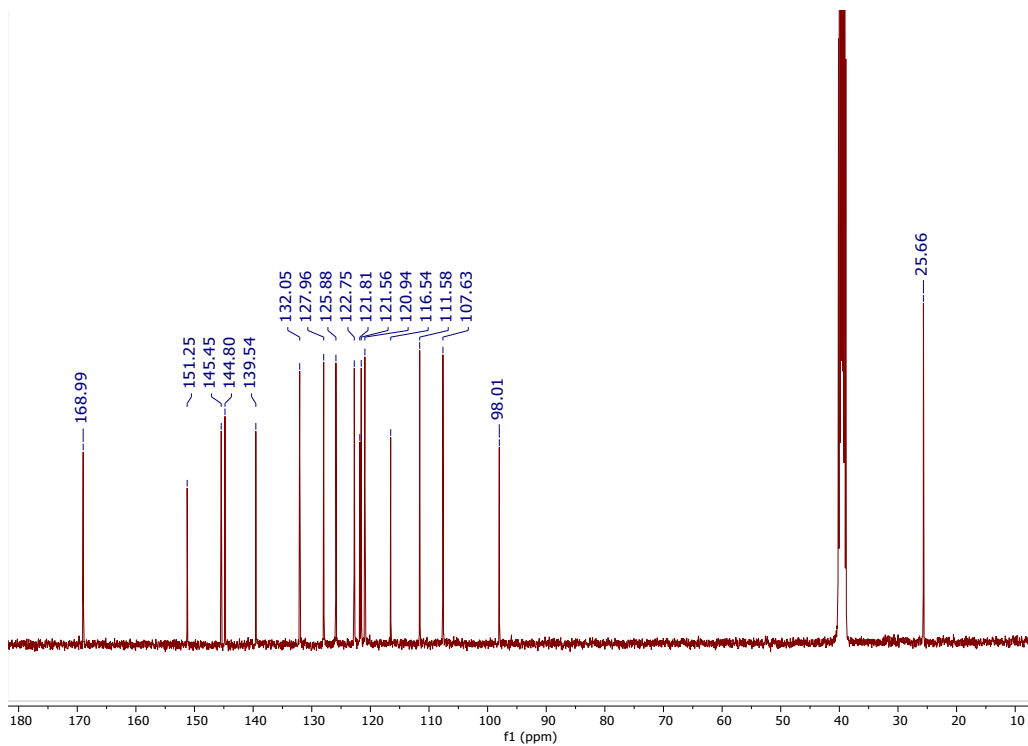

Fig. SI10 <sup>13</sup>C NMR spectrum of MINROx in DMSO-d<sub>6</sub>.

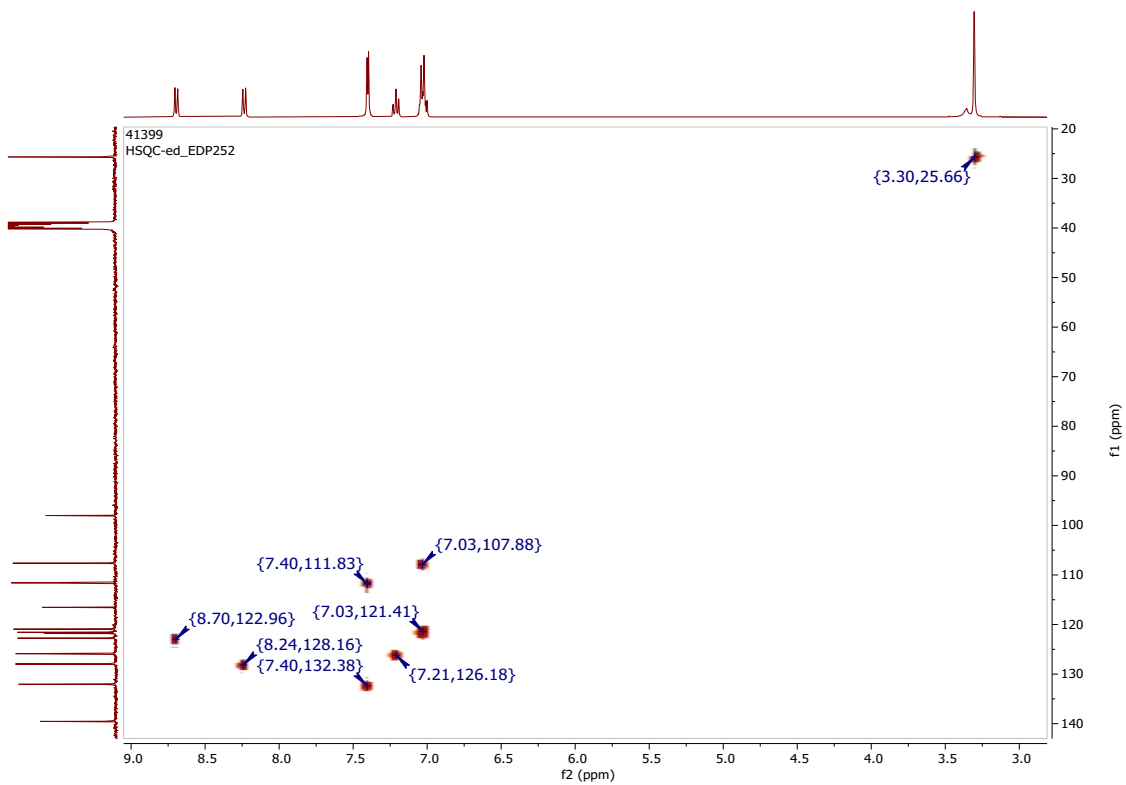

Fig. SI11 HSQC NMR spectrum of MINROx in DMSO-d<sub>6</sub>.

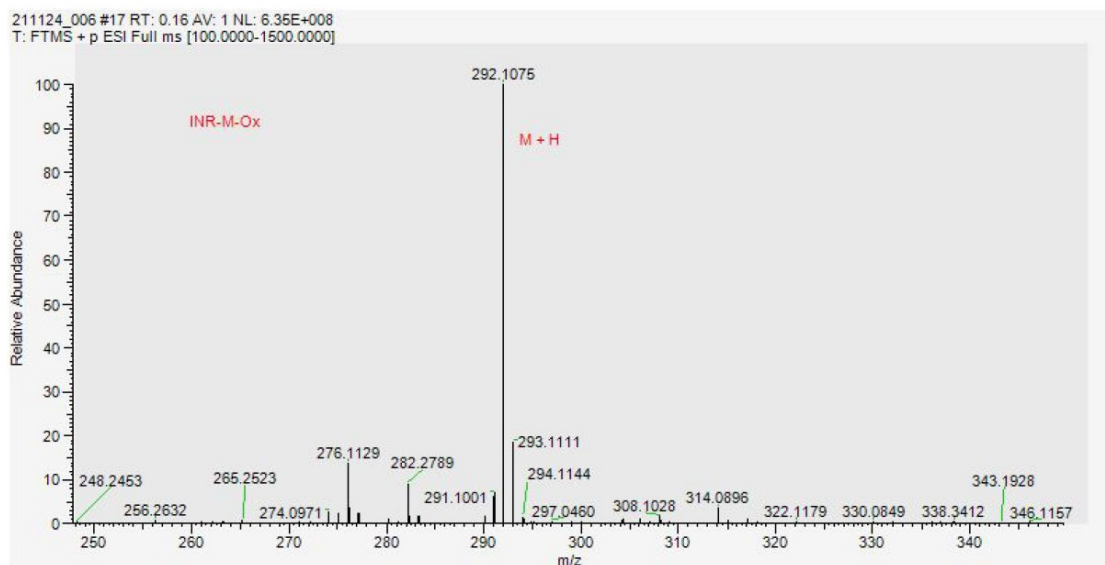

Fig. S112 Mass spectrum of MINROx.

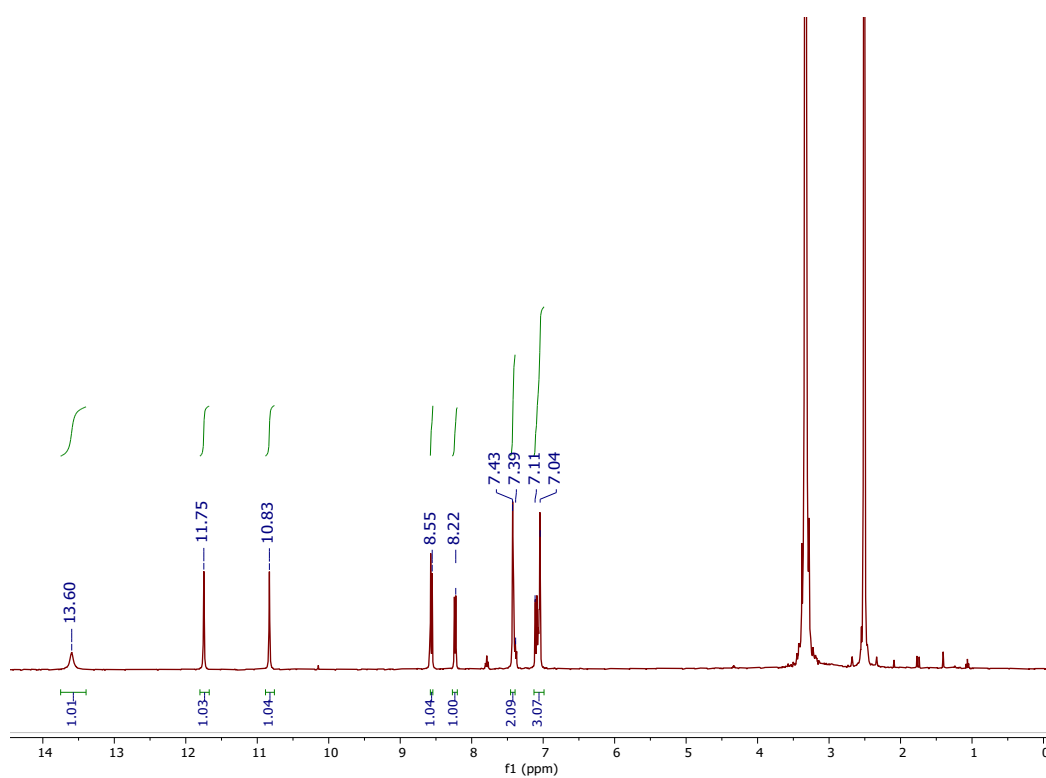

Fig. S113  $^1\text{H}$  NMR spectrum of 6-BrINROx in  $\text{DMSO-d}_6$ .

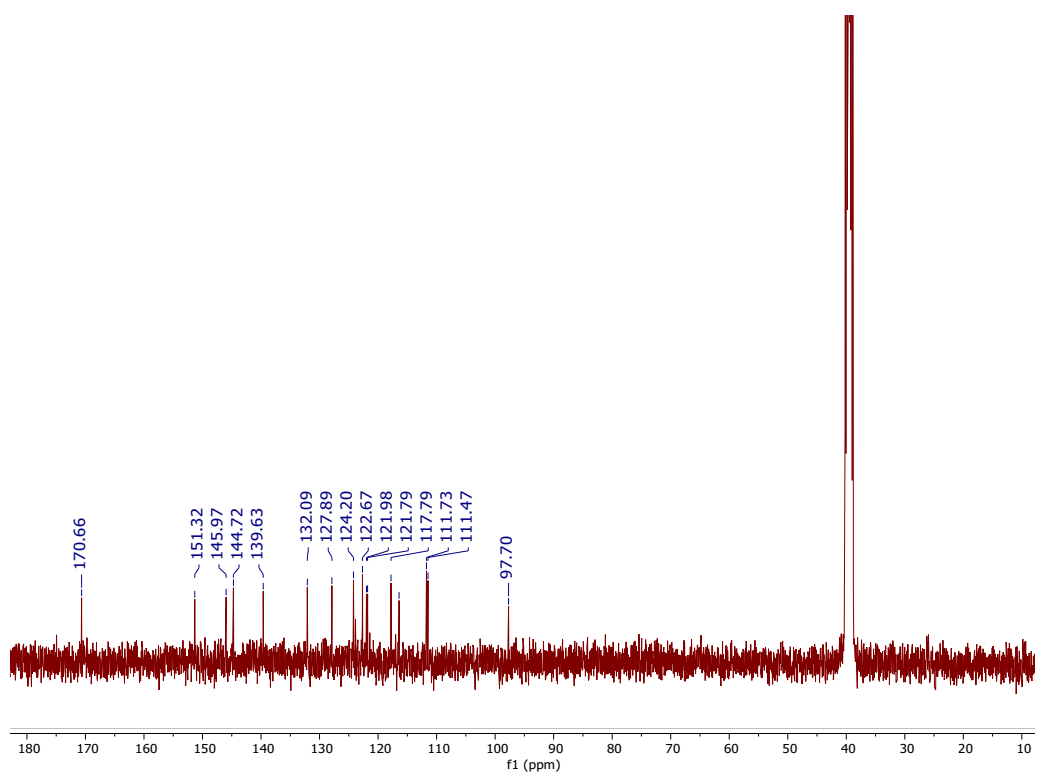

Fig. SI14  $^{13}\text{C}$  NMR spectrum of 6-BrINROx in  $\text{DMSO-d}_6$ .

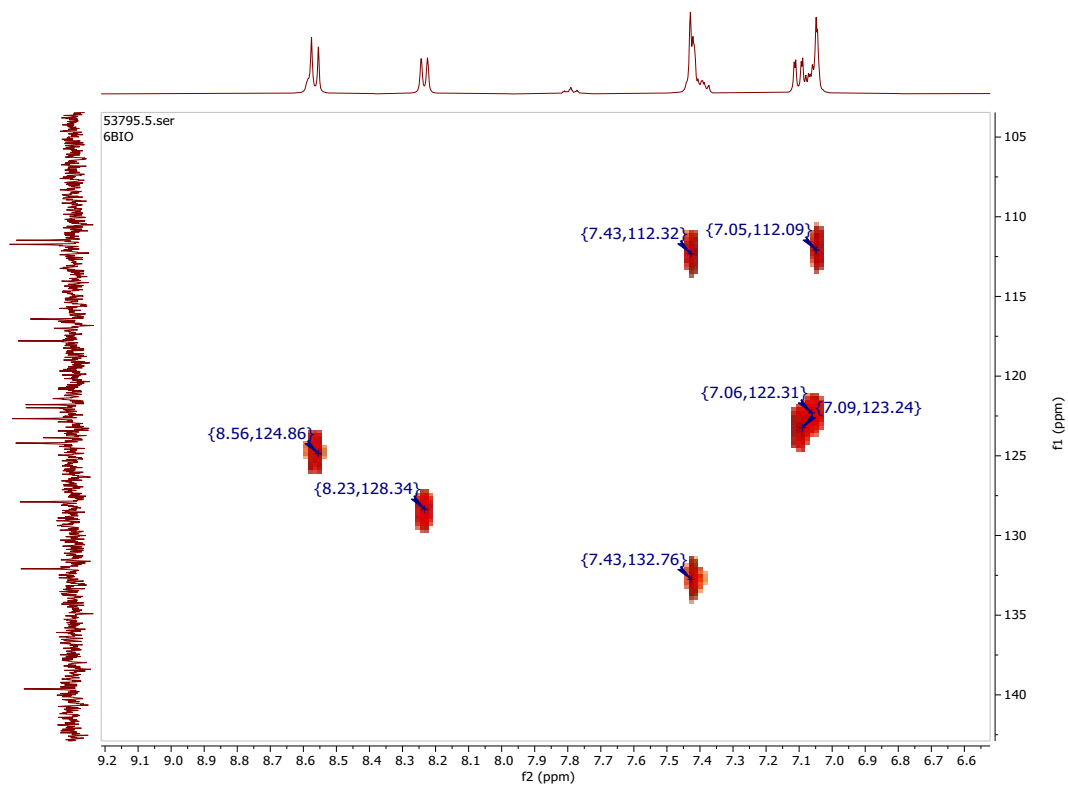

Fig. SI15 HSQC NMR spectrum of 6-BrINROx in  $\text{DMSO-d}_6$ .

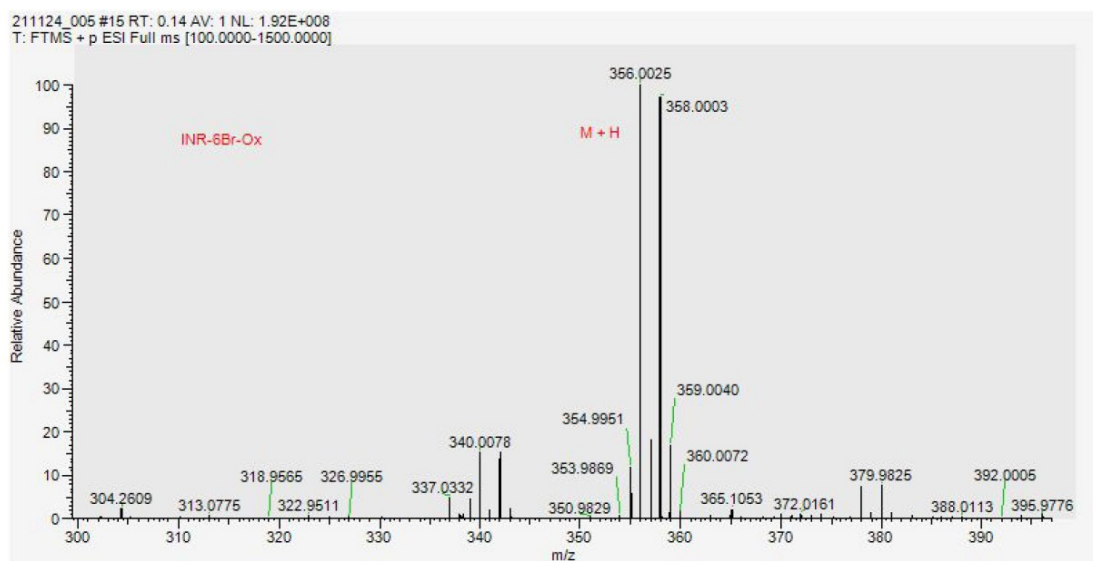

**Fig. S116** Mass spectrum of 6-BrINROx.

### Time-Dependent Density Functional Theoretical Calculations

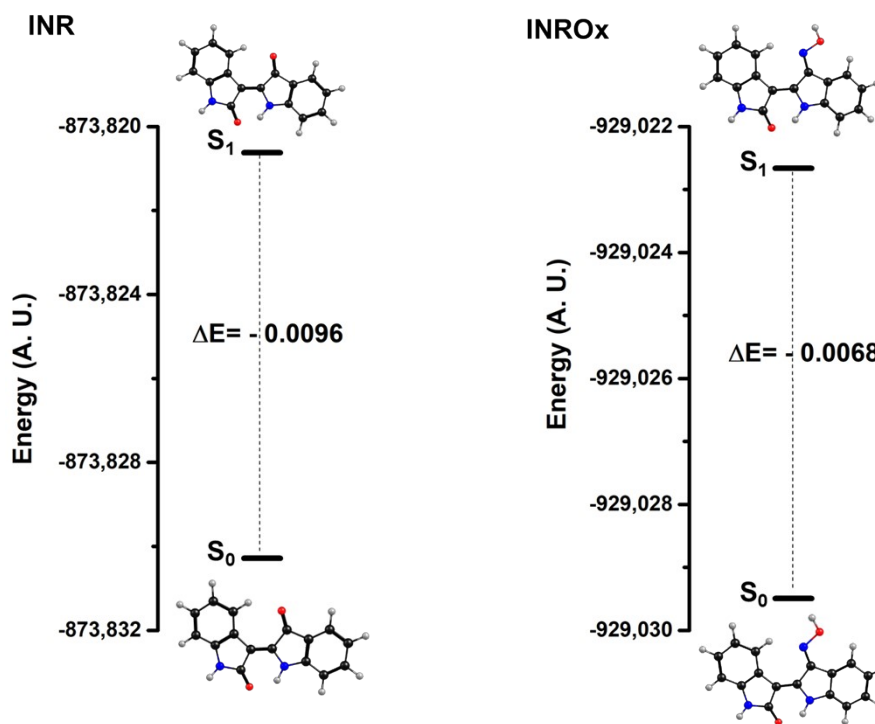

**Fig. S117** Energy difference between the ground state and the first keto singlet excited-state ( $S_1 \rightarrow K-S_0$ ) for INR and INROx in dioxane.

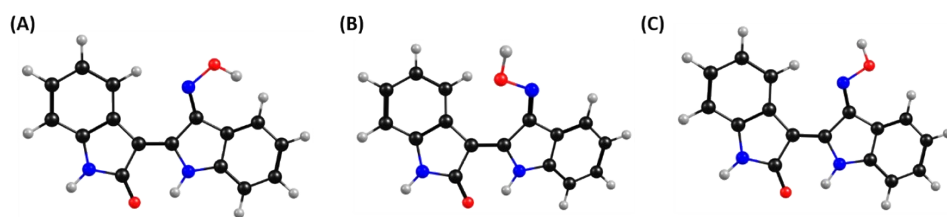

**Fig. S118** Simplified scheme representing the conformational possibilities (structures or conformers A, B, and C) of the oxime-indirubin derivative (INROx).

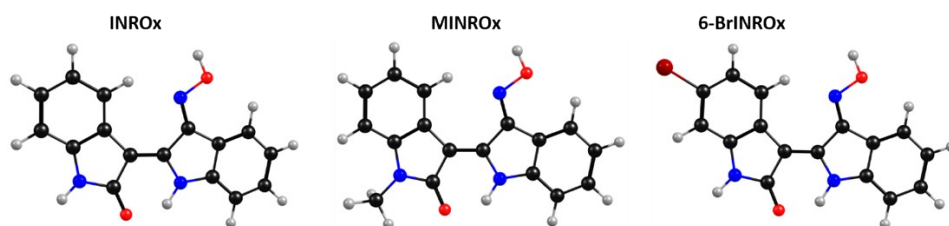

**Fig. S119** Energetically more favourable molecular structures, obtained from TDDFT calculations, for the oxime-indirubin derivatives.

**Table S11.** Decay time values,  $\tau_i$ , obtained from femtosecond Transient Absorption (fs-TA) and femtosecond fluorescence Up Conversion (fs-UC) measurements for INR, INROx, 6-BrINROx, and MINROx, with associated errors, at T=293 K in solvents with varying polarity and viscosity.

| Comp.             | Solvent  | fs-TA         |               | fs-UC         |               |
|-------------------|----------|---------------|---------------|---------------|---------------|
|                   |          | $\tau_1$ (ps) | $\tau_2$ (ps) | $\tau_1$ (ps) | $\tau_2$ (ps) |
| INR <sup>a)</sup> | Dx       | -             | 38            | 3             | 37            |
|                   | MeOH     | 2             | 12            | -             | -             |
|                   | DMF      | 1.8           | 14            | 1             | 8             |
|                   | Glycerol | 16            | 50            | -             | -             |
| INROx             | Dx       | 0.80±*0.27    | 6.81±0.12     | 0.59±0.20     | 4.03±0.46     |
|                   | THF      | 0.74±*0.12    | 4.99±0.76     | 0.48±0.20     | 3.47±0.52     |
|                   | MeOH     | 0.72±*0.31    | 3.71±0.13     | -             | -             |
|                   | DMF      | 0.61±*0.12    | 3.28±0.78     | -             | -             |
|                   | ACN      | 0.63±*0.24    | 3.03±0.57     | 0.58±0.20     | 2.26±0.18     |
|                   | Glycerol | 4.03±0.26     | 92.9±0.81     | -             | -             |
| 6-BrINROx         | Dx       | 1.12±*0.28    | 7.85±0.85     | 0.9±0.41      | 4.69±0.44     |
|                   | THF      | 0.93±*0.11    | 5.60±0.59     | 0.7±0.35      | 3.29±0.31     |
|                   | DMF      | 0.91±*0.24    | 5.28±0.72     | -             | -             |
|                   | ACN      | 0.42±*0.13    | 4.13±0.66     | 0.6±0.20      | 2.53±0.31     |
| MINROx            | Dx       | 0.80±*0.17    | 6.79±0.10     | 0.34±0.23     | 4.07±0.36     |
|                   | THF      | 0.58±*0.36    | 4.61±0.26     | 0.5±0.29      | 4±0.66        |
|                   | DMF      | 0.59±*0.14    | 4.39±0.10     | -             | -             |
|                   | ACN      | 0.50±*0.13    | 3.50±0.98     | 0.3±0.20      | 2.23±0.18     |

**Table S12.** Bond distance between the oxygen in C=O and the hydrogen in N-H for the oxime-indirubin derivatives (INROx, 6-BrINROx and MINROx) obtained using TDDFT calculations in different solvents. The data were obtained at the DFT//LC-BPBE level of theory ( $\omega=0.2$ ).

| Compound  | Solvent | $d_{\text{C=O}\cdots\text{N-H}}$ (pm) |       | $\Delta d_{\text{C=O}\cdots\text{N-H}}$ (pm) |
|-----------|---------|---------------------------------------|-------|----------------------------------------------|
|           |         | $S_0$                                 | $S_1$ |                                              |
| INROx     | Dx      | 174.1                                 | 162.1 | 12                                           |
|           | THF     | 175.2                                 | 165.3 | 9.9                                          |
|           | DMF     | 174.5                                 | 165.0 | 9.5                                          |
|           | ACN     | 173.8                                 | 164.6 | 9.2                                          |
| 6-BrINROx | Dx      | 174.9                                 | 164.8 | 10.1                                         |
|           | THF     | 175.6                                 | 166.5 | 9.1                                          |
|           | DMF     | 175.9                                 | 168.9 | 7.0                                          |
|           | ACN     | 175.5                                 | 167.8 | 7.7                                          |
| MINROx    | Dx      | 175.2                                 | 163.5 | 11.7                                         |
|           | THF     | 175.1                                 | 166.4 | 8.7                                          |
|           | DMF     | 176.9                                 | 165.8 | 11.1                                         |
|           | ACN     | 176.9                                 | 167.2 | 9.7                                          |

LUMO

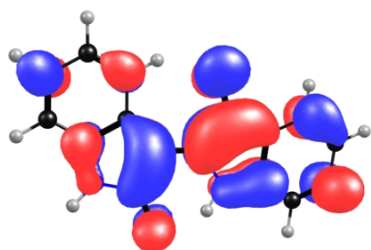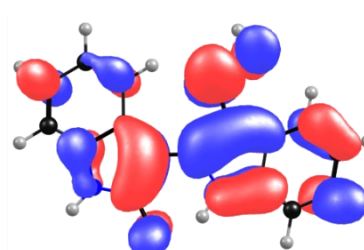

HOMO

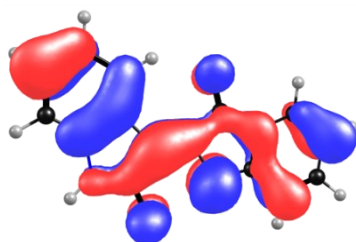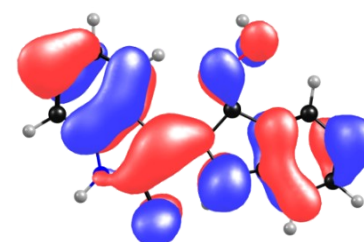

INR

INROx

**Fig. S120** Orbital contours of the HOMO and LUMO for indirubin (INR) and oxime-indirubin (INROx) in dioxane.

**Table S13.** Wavelength absorption and emission maxima, along with oscillator strengths ( $f$ ), for the keto and enol forms of the indirubin-3'-oxime (INROx) obtained using TDDFT calculations in different solvents. The data were obtained at the DFT//LC-BPBE level of theory ( $\omega=0.2$ ).

| Solvent | GS absorption |       | Species     | Emission |       | TA (transient absorption) |       |                       |
|---------|---------------|-------|-------------|----------|-------|---------------------------|-------|-----------------------|
|         | nm            | $f$   |             | nm       | $f$   | nm                        | $f$   | $S_1 \rightarrow S_n$ |
| Dx      | 476           | 0.340 | <i>keto</i> | 545      | 0.306 | 569                       | 0.220 | $S_1 \rightarrow S_7$ |
|         |               |       | <i>enol</i> | 617      | 0.199 | 693                       | 0.248 | $S_1 \rightarrow S_3$ |
|         |               |       |             |          |       | 658                       | 0.046 | $S_1 \rightarrow S_4$ |
| THF     | 473           | 0.339 | <i>keto</i> | 558      | 0.384 | 575                       | 0.222 | $S_1 \rightarrow S_7$ |
|         |               |       | <i>enol</i> | 618      | 0.260 | 700                       | 0.241 | $S_1 \rightarrow S_3$ |
|         |               |       |             |          |       | 658                       | 0.044 | $S_1 \rightarrow S_4$ |
| DMF     | 474           | 0.343 | <i>keto</i> | 566      | 0.414 | 576                       | 0.227 | $S_1 \rightarrow S_7$ |
|         |               |       | <i>enol</i> | 625      | 0.287 | 694                       | 0.242 | $S_1 \rightarrow S_3$ |
|         |               |       |             |          |       | 655                       | 0.045 | $S_1 \rightarrow S_4$ |
| ACN     | 471           | 0.331 | <i>keto</i> | 567      | 0.415 | 576                       | 0.224 | $S_1 \rightarrow S_7$ |
|         |               |       | <i>enol</i> | 621      | 0.288 | 696                       | 0.240 | $S_1 \rightarrow S_3$ |
|         |               |       |             |          |       | 658                       | 0.047 | $S_1 \rightarrow S_4$ |

**Table S14.** Wavelength absorption and emission maxima, along with oscillator strengths ( $f$ ), for the keto and enol forms of the 6-Bromoindirubin-3'-oxime (6BrINROx) obtained using TDDFT calculations in different solvents. The data were obtained at the DFT//LC-BPBE level of theory ( $\omega=0.2$ ).

| Solvent | GS absorption |       | Species     | Emission |       | TA (transient absorption) |       |                       |
|---------|---------------|-------|-------------|----------|-------|---------------------------|-------|-----------------------|
|         | nm            | $f$   |             | nm       | $f$   | nm                        | $f$   | $S_1 \rightarrow S_n$ |
| Dx      | 478           | 0.375 | <i>keto</i> | 546      | 0.335 | 567                       | 0.237 | $S_1 \rightarrow S_7$ |
|         |               |       | <i>enol</i> | 617      | 0.212 | 667                       | 0.050 | $S_1 \rightarrow S_3$ |
|         |               |       |             |          |       | 656                       | 0.182 | $S_1 \rightarrow S_4$ |
| THF     | 475           | 0.374 | <i>keto</i> | 560      | 0.406 | 574                       | 0.234 | $S_1 \rightarrow S_7$ |
|         |               |       | <i>enol</i> | 617      | 0.270 | 669                       | 0.071 | $S_1 \rightarrow S_3$ |
|         |               |       |             |          |       | 658                       | 0.157 | $S_1 \rightarrow S_4$ |
| DMF     | 476           | 0.377 | <i>keto</i> | 564      | 0.436 | 577                       | 0.235 | $S_1 \rightarrow S_7$ |
|         |               |       | <i>enol</i> | 614      | 0.306 | 673                       | 0.110 | $S_1 \rightarrow S_3$ |
|         |               |       |             |          |       | 663                       | 0.127 | $S_1 \rightarrow S_4$ |
| ACN     | 473           | 0.367 | <i>keto</i> | 566      | 0.436 | 576                       | 0.234 | $S_1 \rightarrow S_7$ |
|         |               |       | <i>enol</i> | 615      | 0.307 | 674                       | 0.097 | $S_1 \rightarrow S_3$ |
|         |               |       |             |          |       | 665                       | 0.141 | $S_1 \rightarrow S_4$ |

**Table S15.** Wavelength absorption and emission maxima, along with oscillator strengths ( $f$ ), for the keto and enol forms of the *N*-methylindirubin-3'-oxime (MINROx) obtained using TDDFT calculations in different solvents. The data were obtained at the DFT//LC-BPBE level of theory ( $\omega=0.2$ ).

| Solvent | GS absorption |       | Species     | Emission |       | TA (transient absorption) |       |                       |
|---------|---------------|-------|-------------|----------|-------|---------------------------|-------|-----------------------|
|         | nm            | $f$   |             | nm       | $f$   | nm                        | $f$   | $S_1 \rightarrow S_n$ |
| Dx      | 476           | 0.352 | <i>keto</i> | 543      | 0.320 | 570                       | 0.223 | $S_1 \rightarrow S_7$ |
|         |               |       | <i>enol</i> | 615      | 0.213 | 706                       | 0.304 | $S_1 \rightarrow S_3$ |
|         |               |       |             |          |       | 655                       | 0.050 | $S_1 \rightarrow S_4$ |
| THF     | 473           | 0.351 | <i>keto</i> | 557      | 0.397 | 576                       | 0.224 | $S_1 \rightarrow S_7$ |
|         |               |       | <i>enol</i> | 617      | 0.278 | 710                       | 0.298 | $S_1 \rightarrow S_3$ |
|         |               |       |             |          |       | 653                       | 0.052 | $S_1 \rightarrow S_4$ |
| DMF     | 472           | 0.354 | <i>keto</i> | 565      | 0.426 | 576                       | 0.229 | $S_1 \rightarrow S_7$ |
|         |               |       | <i>enol</i> | 614      | 0.312 | 713                       | 0.299 | $S_1 \rightarrow S_3$ |
|         |               |       |             |          |       | 652                       | 0.055 | $S_1 \rightarrow S_4$ |
| ACN     | 470           | 0.343 | <i>keto</i> | 563      | 0.429 | 578                       | 0.226 | $S_1 \rightarrow S_7$ |
|         |               |       | <i>enol</i> | 620      | 0.305 | 708                       | 0.293 | $S_1 \rightarrow S_3$ |
|         |               |       |             |          |       | 655                       | 0.051 | $S_1 \rightarrow S_4$ |

## References

1. G. A. Russell and G. Kaupp, *Journal of the American Chemical Society*, 1969, **91**, 3851-3859.
2. R. Hoessel, S. Leclerc, J. A. Endicott, M. E. M. Nobel, A. Lawrie, P. Tunnah, M. Leost, E. Damiens, D. Marie, D. Marko, E. Niederberger, W. Tang, G. Eisenbrand and L. Meijer, *Nature Cell Biology*, 1999, **1**, 60-67.
3. D. C. Nobre, E. Delgado-Pinar, C. Cunha, A. M. Galvão and J. S. Seixas de Melo, *Dyes and Pigments*, 2023, **212**, 111116.
